# Supplementary material for: Alignment of Supermarket Own Brand Foods’ Front-of-Pack Nutrition Labelling with Measures of Nutritional Quality: An Australian Perspective
Source: MDPI journal article supplement (doi:10.3390/nu10101465), 2018-10-09
Supplement: s1 [file s1]

Supplementary Figure 1: Front of pack nutrition labels present in Australia

|                                                                                                                                                                                                                                                                                              |                                                                                                                                                                                                                                                                                                                                                                           |
|----------------------------------------------------------------------------------------------------------------------------------------------------------------------------------------------------------------------------------------------------------------------------------------------|---------------------------------------------------------------------------------------------------------------------------------------------------------------------------------------------------------------------------------------------------------------------------------------------------------------------------------------------------------------------------|
| <div data-bbox="327 338 719 456"></div> <div data-bbox="346 512 715 640"></div> <div data-bbox="413 692 622 831"></div> <div data-bbox="454 887 595 1025"></div> <div data-bbox="485 1084 568 1205"></div> <p>The different options for displaying the Health Star Rating system graphic</p> | <p><b>Positive attributes:</b></p> <p>Protein</p> <p>Dietary fibre</p> <p>Fruit, vegetable, nut and legume content</p> <p>Calcium – for dairy beverages and dairy foods</p> <p><b>Negative attributes:</b></p> <p>Energy</p> <p>Saturated fat</p> <p>Total sugar</p> <p>Sodium</p> <p>Nutrients and ingredients that are included in the Health Star Rating algorithm</p> |
| <div data-bbox="317 1384 719 1503"></div> <div data-bbox="272 1547 754 1653"></div> <div data-bbox="314 1688 726 1834"></div> <div data-bbox="478 1874 568 1980"></div> <p>The options for displaying the Daily Intake Guide</p>                                                             | <p><b>Core nutrients:</b></p> <p>Fat</p> <p>Saturated fat</p> <p>Total sugar</p> <p>Sodium</p> <p><b>Optional nutrients:</b></p> <p>Protein</p> <p>Carbohydrate</p> <p>Nutrients recommended for display in the Daily Intake Guide</p>                                                                                                                                    |
