# Supplementary figures and images for: Alignment of Supermarket Own Brand Foods’ Front-of-Pack Nutrition Labelling with Measures of Nutritional Quality: An Australian Perspective
Source: MDPI journal article supplement (doi:10.3390/nu10101465), 2018-10-09

**Supplementary Figure 2: The research process**

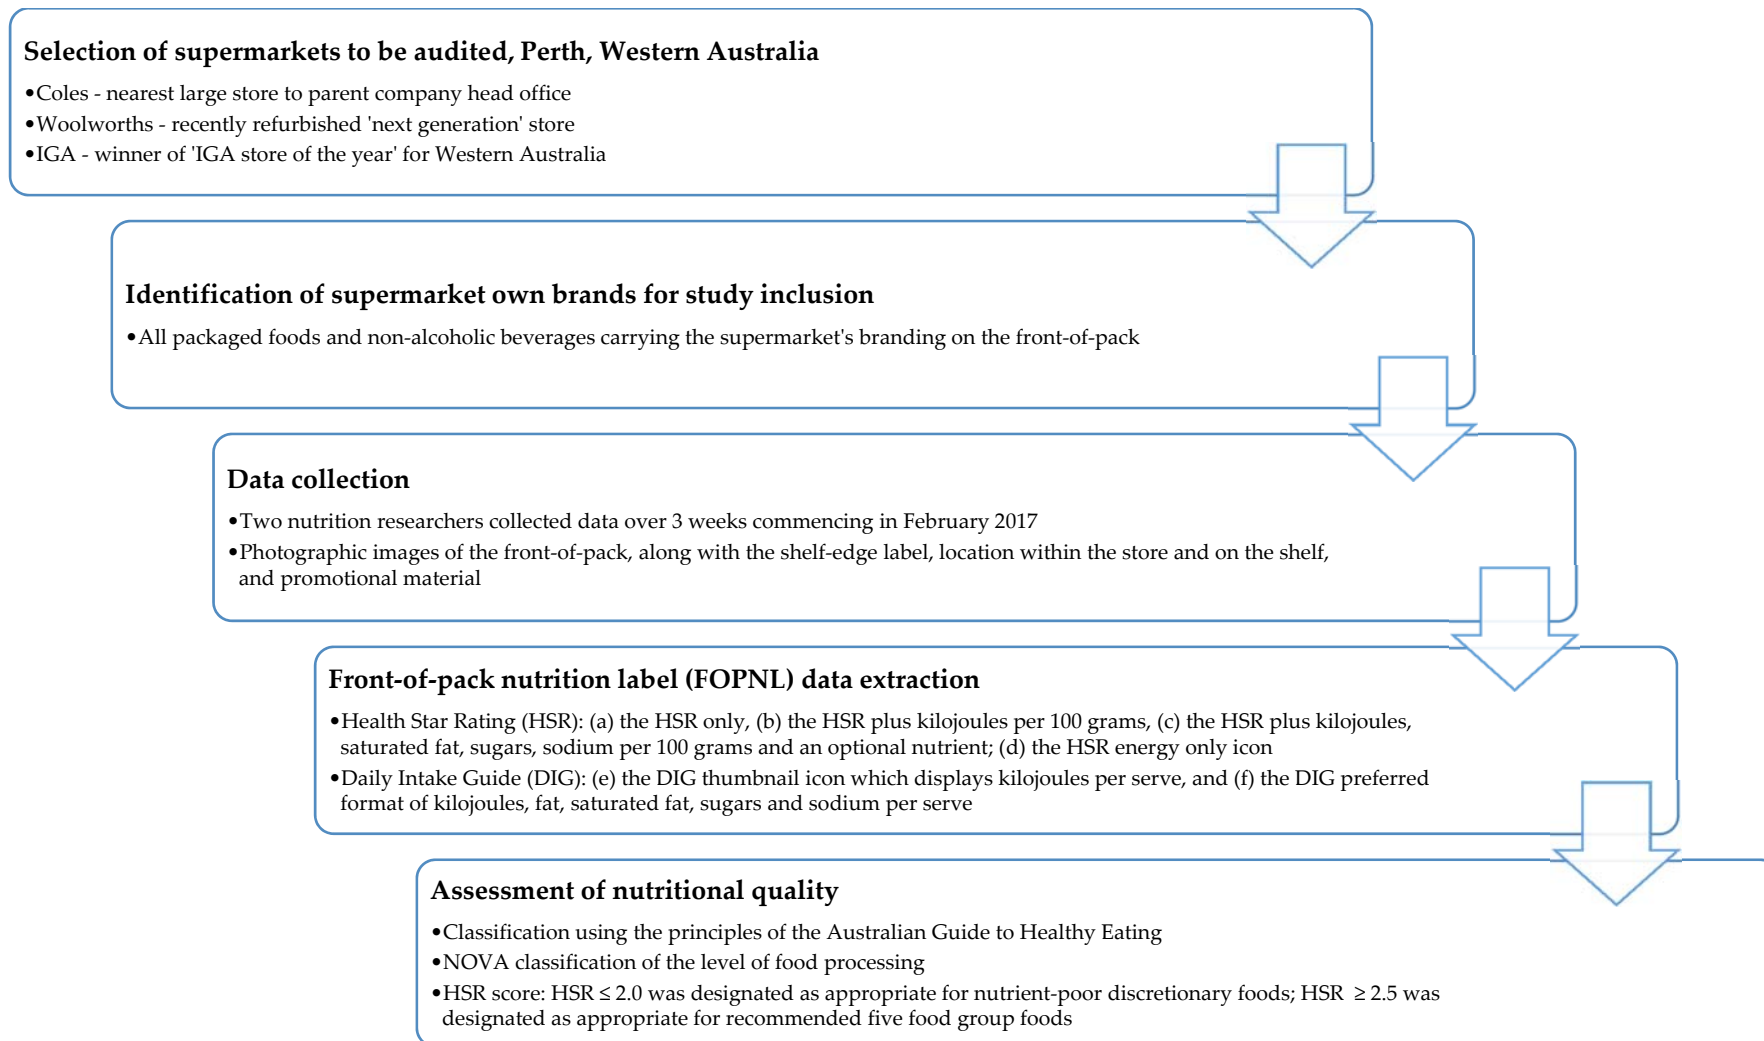

Supplement: s1 [file s1]
